# Supplementary material for: Association between FGF19, FGF21 and lipocalin-2, and diabetes progression in PCOS
Source: PubMed Central journal article supplement — Endocr Connect. 2021 Sep 2;10(10):1243–52. doi: 10.1530/EC-21-0082 (PMC8494400; doi:10.1530/ec-21-0082), 2021-09-02
Supplement: supplementary_table_1.pdf [file supplementary_table_1.pdf]

Table S1. Baseline characteristics of women with PCOS included in this study, those that defaulted, and those remaining

|                                | <b>PCOS included</b> | <b>PCOS defaulted follow-up</b> | <b>PCOS not included</b> | <b>P</b>           | <b>P</b>           |
|--------------------------------|----------------------|---------------------------------|--------------------------|--------------------|--------------------|
|                                | <b>(a)</b>           | <b>assessment (b)</b>           | <b>(c)</b>               | <b>value</b>       | <b>value</b>       |
| <b>N</b>                       | 128                  | 96                              | 167                      | a vs. b            | a vs. c            |
| <b>Age (years)</b>             | 30.0 ± 6.4           | 28.0 ± 5.6                      | 29.5 ± 6.3               | 0.012              | 0.427              |
| <b>BMI (kg/m<sup>2</sup>)</b>  | 25.9 ± 5.8           | 25.7 ± 6.4                      | 25.8 ± 6.0               | 0.765              | 0.833              |
| <b>Waist Circumference</b>     | 82.5 ± 13.0          | 81.6 ± 13.8                     | 82.1 ± 13.2              | 0.647              | 0.786              |
| <b>(cm)</b>                    |                      |                                 |                          |                    |                    |
| <b>Waist-to-hip ratio</b>      | 0.8 ± 0.1            | 0.8 ± 0.1                       | 0.8 ± 0.1                | 0.515              | 0.958              |
| <b>SBP (mmHg)</b>              | 116 ± 17             | 116 ± 17                        | 117 ± 17                 | 0.983              | 0.798              |
| <b>DBP (mmHg)</b>              | 72 ± 11              | 70 ± 11                         | 70 ± 11                  | 0.144              | 0.183              |
| <b>Glu-fast (mmol/L)</b>       | 5.1 ± 1.1            | 5.1 ± 1.1                       | 5.2 ± 1.1                | 0.953              | 0.340              |
| <b>Glu-2h (mmol/L)</b>         | 7.3 ± 2.8            | 6.7 ± 2.7                       | 6.8 ± 2.7                | 0.201              | 0.198              |
| <b>Fasting insulin (μU/mL)</b> | 17.3 (42.0-10.5)     | 10.7 (6.2-17.3)                 | 12.0 (6.3-18.6)          | 0.568 <sup>#</sup> | 1.000 <sup>#</sup> |
| <b>HOMA-IR</b>                 | 4.0 (42.0-2.3)       | 2.4 (1.2-4.0)                   | 2.8 (1.4-4.4)            | 0.435 <sup>#</sup> | 0.932 <sup>#</sup> |
| <b>HOMA- β</b>                 | 238 (42-153)         | 144 (103-238)                   | 143 (102-236)            | 0.878 <sup>#</sup> | 0.912 <sup>#</sup> |

|                              |               |               |               |                    |                    |
|------------------------------|---------------|---------------|---------------|--------------------|--------------------|
| <b>Total Cholesterol</b>     | 4.8 ± 1.0     | 4.7 ± 0.9     | 4.8 ± 0.9     | 0.236              | 0.627              |
| <b>(mmol/L)</b>              |               |               |               |                    |                    |
| <b>Triglyceride (mmol/L)</b> | 1.3 (1.0-0.9) | 0.9 (0.6-1.3) | 1.0 (0.7-1.6) | 0.401 <sup>#</sup> | 0.452 <sup>#</sup> |
| <b>HDL-C (mmol/L)</b>        | 1.7 ± 0.6     | 1.6 ± 0.5     | 1.5 ± 0.4     | 0.232              | 0.057              |
| <b>LDL-C (mmol/L)</b>        | 2.7 ± 0.8     | 2.6 ± 0.8     | 2.8 ± 2.2     | 0.941              | 0.376              |
| <b>LH (IU/L)</b>             | 8.6 ± 6.5     | 8.6 ± 5.4     | 9.0 ± 6.0     | 0.932              | 0.623              |
| <b>FSH (IU/L)</b>            | 5.6 ± 2.0     | 5.7 ± 1.6     | 5.8 ± 1.6     | 0.807              | 0.343              |
| <b>Estrogen (pmol/L)</b>     | 208 (9-141)   | 144 (111-208) | 134 (106-188) | 0.572 <sup>#</sup> | 0.111 <sup>#</sup> |
| <b>Testosterone (nmol/L)</b> | 2.9 (6.0-1.7) | 1.9 (1.3-2.9) | 1.8 (1.2-2.5) | 0.095 <sup>#</sup> | 0.321 <sup>#</sup> |

Data are expressed as mean ± SD, median (Q1-Q3), and analyzed by t-test or <sup>#</sup> Mann-Whitney U-test as appropriate.

Abbreviation: BMI, body mass index; SBP, systolic blood pressure; DBP, diastolic blood pressure; HDL-C, high-density lipoprotein cholesterol; LDL-C, low-density lipoprotein cholesterol; Glu-fast, fasting glucose; Glu-2h, two-hour glucose; HOMA-IR, homeostasis model assessment of insulin resistance; HOMA-β, homeostasis model assessment of beta cell function; LH, luteinizing hormone; FSH, follicle-stimulating hormone.
