# Supplementary material for: Association between FGF19, FGF21 and lipocalin-2, and diabetes progression in PCOS
Source: PubMed Central journal article supplement — Endocr Connect. 2021 Sep 2;10(10):1243–52. doi: 10.1530/EC-21-0082 (PMC8494400; doi:10.1530/ec-21-0082), 2021-09-02
Supplement: supplementary_table_2.pdf [file supplementary_table_2.pdf]

Table S2. The comparison between baseline and follow-up

|                                   | Control    |            |         | PCOS       |             |         |
|-----------------------------------|------------|------------|---------|------------|-------------|---------|
|                                   | Baseline   | Follow-up  | P value | Baseline   | Follow-up   | P value |
|                                   | (n=128)    | (n=119)    |         | (n=128)    | (n=128)     |         |
| <b>Age (years)</b>                | 42.8 ± 7.2 | 53.9 ± 7   | <0.001  | 30.0 ± 6.4 | 40.5 ± 6.1  | <0.001  |
| <b>Follow-up duration (years)</b> |            | 11.3 ± 0.5 |         |            | 10.4 ± 1.2  |         |
| <b>BMI (kg/m<sup>2</sup>)</b>     | 23.1 ± 3.6 | 23.9 ± 4   | <0.001  | 25.9 ± 5.8 | 26.9 ± 6.3  | <0.001  |
| <b>waist (cm)</b>                 | 75.3 ± 8.3 | 81 ± 9.7   | <0.001  | 82.5 ± 13  | 83.5 ± 14.5 | .176    |
| <b>Waist-to-hip ratio</b>         | 0.8 ± 0.1  | 0.9 ± 0.1  | <0.001  | 0.8 ± 0.1  | 0.8 ± 0.1   | 0.001   |
| <b>SBP (mmHg)</b>                 | 111 ± 15   | 121 ± 16   | <0.001  | 111 ± 15   | 119 ± 15    | <0.001  |

|                                   |                |               |                     |                 |                |                   |
|-----------------------------------|----------------|---------------|---------------------|-----------------|----------------|-------------------|
| <b>DBP (mmHg)</b>                 | 71 ± 10        | 74 ± 10       | <0.001              | 71 ± 10         | 78 ± 12        | <0.001            |
| <b>Total Cholesterol (mmol/L)</b> | 5.1 ± 1.1      | 5.4 ± 0.7     | <0.001              | 4.8 ± 1.1       | 5 ± 0.9        | .042              |
| <b>Triglyceride (mmol/L)</b>      | 0.8 (0.6-1.2)  | 0.9 (0.7-1.4) | <0.001 <sup>#</sup> | 0.9 (0.7-1.5)   | 1.1 (0.7-1.7)  | .005 <sup>#</sup> |
| <b>HDL-C (mmol/L)</b>             | 1.7±0.5        | 1.8 ± 0.4     | .666                | 1.6 ± 0.6       | 1.6 ± 0.5      | .072              |
| <b>LDL-C (mmol/L)</b>             | 2.9 ± 1.0      | 3.1 ± 0.7     | 0.009               | 2.6 ± 0.9       | 2.8 ± 0.8      | 0.007             |
| <b>Glu-fast (mmol/L)</b>          | 4.8±0.5        | 5 ± 0.6       | <0.001              | 5.1 ± 1.1       | 5.5 ± 1.9      | .001              |
| <b>Glu-2h (mmol/L)</b>            | 6.3±1.8        | 6.6 ± 1.8     | .008                | 7.3 ± 2.8       | 7.8 ± 3.6      | .001              |
| <b>Insulin (μU/ml)</b>            | 7.4 (4.9-10.8) | 6.9 (4.8-9.7) | .157 <sup>#</sup>   | 10.5 (6.2-22.6) | 8.2 (4.9-14.9) | .002 <sup>#</sup> |
| <b>HOMA-IR</b>                    | 1.6 (1.0-2.4)  | 1.4 (1.0-2.1) | .531 <sup>#</sup>   | 2.3 (1.3-5.5)   | 2.0 (1.0-3.8)  | .078 <sup>#</sup> |

|                   |              |             |                     |              |              |                     |
|-------------------|--------------|-------------|---------------------|--------------|--------------|---------------------|
| <b>HOMA-β</b>     | 121 (76-203) | 85 (65-137) | <0.001 <sup>#</sup> | 153 (93-296) | 115 (73-183) | <0.001 <sup>#</sup> |
| <b>LH (IU/L)</b>  | -            | -           | -                   | 8.6 ± 6.5    | 9.5 ± 10.3   | .985                |
| <b>FSH (IU/L)</b> | -            | -           | -                   | 5.6 ± 2.0    | 8.5 ± 8.2    | <0.001              |
| <b>LH/FSH</b>     | -            | -           | -                   | 1.6 ± 1.1    | 1.4 ± 1.4    | .010                |

---

Data are expressed as mean ± SD, median (Q1-Q3), and analyzed by paired samples t-test or <sup>#</sup> Mann-Whitney U-test as appropriate.

Abbreviation: BMI, body mass index; SBP, systolic blood pressure; DBP, diastolic blood pressure; HDL-C, high-density lipoprotein cholesterol; LDL-C, low-density lipoprotein cholesterol; Glu-fast, fasting glucose; Glu-2h, two-hour glucose; HOMA-IR, homeostasis model assessment of insulin resistance; HOMA-β, homeostasis model assessment of beta cell function; LH, luteinizing hormone; FSH, follicle-stimulating hormone.
