# Supplementary material for: Association between FGF19, FGF21 and lipocalin-2, and diabetes progression in PCOS
Source: PubMed Central journal article supplement — Endocr Connect. 2021 Sep 2;10(10):1243–52. doi: 10.1530/EC-21-0082 (PMC8494400; doi:10.1530/ec-21-0082), 2021-09-02
Supplement: supplementary_table_3.pdf [file supplementary_table_3.pdf]

Table S3. Association of biomarkers risk score with clinical variables in women with or without PCOS with FGF-19 > 123.7 pg/ml, FGF-21 > 103.7 pg/ml or lipocalin-2 < 94.0 ng/ml each given 1 point

| <b>Risk score</b>             | <b>≤1</b>  | <b>2</b>   | <b>3</b>   | <b>P value</b>     |
|-------------------------------|------------|------------|------------|--------------------|
| <b>Subjects (%)</b>           | 35.3%      | 36.2%      | 28.5%      |                    |
| <b>Age (years)</b>            | 38.3 ± 9.2 | 36.4 ± 8.8 | 34.0 ± 9.9 |                    |
| <b>BMI (kg/m<sup>2</sup>)</b> | 24.9 ± 5.0 | 24.6 ± 5.3 | 23.7 ± 4.6 |                    |
| <b>Waist-to-hip ratio</b>     | 0.8 ± 0.1  | 0.8 ± 0.1  | 0.8 ± 0    |                    |
| <b>SBP (mmHg)</b>             | 108 ± 16   | 113 ± 15   | 112 ± 15   | 0.034              |
| <b>DBP (mmHg)</b>             | 70 ± 10    | 72 ± 10    | 72 ± 10    | 0.094              |
| <b>Hypertension</b>           | 10.8%      | 12.9%      | 17.9%      | 0.035 <sup>#</sup> |

|                                   |                |                |                |                        |
|-----------------------------------|----------------|----------------|----------------|------------------------|
| <b>Dyslipidemia</b>               | 62.7%          | 61.2%          | 47.8%          | 0.358 <sup>#</sup>     |
| <b>Total Cholesterol (mmol/L)</b> | 5.0 ± 1.0      | 5.1 ± 1.0      | 4.7 ± 0.8      | 0.178                  |
| <b>Triglyceride (mmol/L)</b>      | 0.8 (0.6-1.4)  | 0.9 (0.6-1.4)  | 0.9 (0.6-1.3)  | 0.672 <sup>&amp;</sup> |
| <b>HDL-C (mmol/L)</b>             | 1.7 ± 0.6      | 1.7 ± 0.5      | 1.6 ± 0.6      | 0.339                  |
| <b>LDL-C (mmol/L)</b>             | 2.8 ± 1.0      | 2.9 ± 0.9      | 2.7 ± 0.8      | 0.613                  |
| <b>Glu-fast (mmol/L)</b>          | 5.0 ± 1.1      | 5 ± 0.8        | 4.9 ± 0.9      | 0.795                  |
| <b>Glu-2h (mmol/L)</b>            | 6.9 ± 2.5      | 6.6 ± 2.0      | 6.8 ± 2.5      | 0.952                  |
| <b>Insulin (μU/ml)</b>            | 7.6 (4.9-12.9) | 8.0 (5.7-14.4) | 9.4 (4.8-17.7) | 0.141 <sup>&amp;</sup> |
| <b>HOMA-IR</b>                    | 1.6 (1.1-3.0)  | 1.9 (1.1-3.6)  | 2.0 (1.1-4.5)  | 0.068 <sup>&amp;</sup> |
| <b>HOMA-β</b>                     | 133 (79-204)   | 137 (92-244)   | 142 (69-250)   | 0.722 <sup>&amp;</sup> |

|                                        |                |                 |                  |                        |
|----------------------------------------|----------------|-----------------|------------------|------------------------|
| <b>eGFR (mL/min/1.73m<sup>2</sup>)</b> | 103.5 ± 17.2   | 109.5 ± 16.3    | 107.6 ± 13.8     | 0.458                  |
| <b>Hyperandrogenism</b>                | 25.3%          | 40.0%           | 38.8%            | 0.017 <sup>#</sup>     |
| <b>Testosterone (nmol/L)</b>           | 1.9 (1.3-2.3)  | 1.5 (1.2-2.0)   | 1.5 (1.0-2.2)    | 0.448 <sup>&amp;</sup> |
| <b>AMH (pmol/l)</b>                    | 9.0 (1.9-21.4) | 19.1 (3.8-34.7) | 26.6 (14.7-39.7) | 0.003 <sup>&amp;</sup> |
| <b>LH (IU/L)</b>                       | 8.0 ± 5.4      | 7.7 ± 5.8       | 9.3 ± 7.4        | 0.586                  |
| <b>FSH (IU/L)</b>                      | 5.4 ± 2.5      | 5.5 ± 1.9       | 5.9 ± 2.0        | 0.124                  |
| <b>LH/FSH</b>                          | 1.5 ± 0.9      | 1.4 ± 1.0       | 1.6 ± 1.0        | 0.774                  |
| <b>Estrogen (pmol/L)</b>               | 142 (130-290)  | 130 (107-204)   | 159 (100-228)    | 0.684 <sup>&amp;</sup> |

---

Data were shown as mean ± SD, median(Q1-Q3) or proportion in %. <sup>&</sup>Ln transformation was used in triglyceride, insulin, HOMA-IR, HOMA-β, Testosterone, AMH and Estrogen. The association of risk score with clinical variables was adjusted for age and BMI by using either linear regression for continuous data or <sup>#</sup>logistic regression for category variables.

Abbreviation: BMI, body mass index; SBP, systolic blood pressure; DBP, diastolic blood pressure; HDL-C, high-density lipoprotein cholesterol; LDL-C, low-density lipoprotein cholesterol; Glu-fast, fasting glucose; Glu-2h, two-hour glucose; HOMA-IR, homeostasis model assessment of insulin resistance; HOMA- $\beta$ , homeostasis model assessment of beta cell function; eGFR, estimated glomerular filtration rate; AMH, anti-Mullerian hormone; LH, luteinizing hormone; FSH, follicle-stimulating hormone.
