# Supplementary material for: Association between FGF19, FGF21 and lipocalin-2, and diabetes progression in PCOS
Source: PubMed Central journal article supplement — Endocr Connect. 2021 Sep 2;10(10):1243–52. doi: 10.1530/EC-21-0082 (PMC8494400; doi:10.1530/ec-21-0082), 2021-09-02
Supplement: supplementary_table_4.pdf [file supplementary_table_4.pdf]

Table S4. logistic regression models for the risk of progression to pre-diabetes or to diabetes in women with and without PCOS

| Model          | Biomarkers       | PCOS          |       | Control       |       | Q-test |
|----------------|------------------|---------------|-------|---------------|-------|--------|
|                |                  | OR (95% CI)   | P     | OR (95% CI)   | P     | P      |
| <b>Model 1</b> | Ln (FGF-19)      | 0.7 (0.4-1.2) | 0.182 | 1.3 (0.9-1.9) | 0.208 | 0.067  |
|                | Ln (FGF-21)      | 1.1 (0.7-1.8) | 0.583 | 1.6 (1.0-2.6) | 0.038 | 0.280  |
|                | Ln (Lipocalin-2) | 2.4 (1.1-5.2) | 0.029 | 1.3 (0.7-2.5) | 0.455 | 0.245  |
| <b>Model 2</b> | Ln (FGF-19)      | 0.7 (0.4-1.1) | 0.157 | 1.3 (0.9-1.9) | 0.202 | 0.057  |
|                | Ln (FGF-21)      | 1.2 (0.7-1.9) | 0.538 | 1.7 (1.0-2.7) | 0.039 | 0.293  |
|                | Ln (Lipocalin-2) | 2.4 (1.1-5.2) | 0.031 | 1.3 (0.7-2.5) | 0.465 | 0.252  |
| <b>Model 3</b> | Ln (FGF-19)      | 0.8 (0.5-1.4) | 0.499 | 1.2 (0.8-1.9) | 0.356 | 0.263  |

|                |                  |               |       |               |       |       |
|----------------|------------------|---------------|-------|---------------|-------|-------|
|                | Ln (FGF-21)      | 1.3 (0.8-2.0) | 0.351 | 1.6 (1.0-2.8) | 0.061 | 0.460 |
|                | Ln (Lipocalin-2) | 2.3 (1.0-5.3) | 0.062 | 0.9 (0.4-2.0) | 0.825 | 0.123 |
| <b>Model 4</b> | Ln (FGF-19)      | 1.1 (0.6-2.0) | 0.812 | 1.2 (0.7-1.9) | 0.504 | 0.824 |
|                | Ln (FGF-21)      | 1.3 (0.8-2.2) | 0.306 | 1.3 (0.7-2.2) | 0.372 | 0.962 |
|                | Ln (Lipocalin-2) | 2.6 (1.0-6.7) | 0.047 | 0.8 (0.4-2.0) | 0.685 | 0.080 |

---

Ln, natural logarithm. The diagnosis of pre-diabetes included glucose intolerance, impaired fasting glucose or two both. Model 1: no adjustment. Model 2: Model 1 + adjusted for age. Model 3: Model 2 + adjusted for waist at baseline. Model 4: Model 3 + adjusted for fasting glucose at baseline.
