# Supplementary material for: Association between FGF19, FGF21 and lipocalin-2, and diabetes progression in PCOS
Source: PubMed Central journal article supplement — Endocr Connect. 2021 Sep 2;10(10):1243–52. doi: 10.1530/EC-21-0082 (PMC8494400; doi:10.1530/ec-21-0082), 2021-09-02
Supplement: supplementary_table_5.pdf [file supplementary_table_5.pdf]

Table S5 The comparison of clinical characteristics between non-converters and converter in PCOS and control group

| Baseline variables                     | Control        |                |                  | PCOS             |                  |                  |
|----------------------------------------|----------------|----------------|------------------|------------------|------------------|------------------|
|                                        | Non-converters | Converters     | P value          | Non-converters   | Converters       | P value          |
| <b>Number</b>                          | 108            | 11             |                  | 95               | 25               |                  |
| <b>Age (years)</b>                     | 42.6 ± 7.0     | 44.2 ± 7.0     | 0.596            | 29.8 ± 6.4       | 30.8 ± 6.3       | 0.423            |
| <b>BMI (kg/m<sup>2</sup>)</b>          | 22.8 ± 3.5     | 25.6 ± 3.9     | <b>0.021</b>     | 24.7 ± 5.6       | 28.8 ± 5.3       | <b>0.001</b>     |
| <b>waist (cm)</b>                      | 74.6 ± 8.1     | 80.6 ± 9.0     | <b>0.024</b>     | 79.3 ± 11.9      | 90.5 ± 12.1      | <b>&lt;0.001</b> |
| <b>Waist-to-hip ratio</b>              | 0.8 ± 0.1      | 0.8 ± 0.1      | 0.123            | 0.8 ± 0.1        | 0.9 ± 0.1        | <b>0.001</b>     |
| <b>SBP (mmHg)</b>                      | 111 ± 15       | 115 ± 15       | 0.994            | 111 ± 15         | 112 ± 16         | 0.992            |
| <b>DBP (mmHg)</b>                      | 71 ± 10        | 72 ± 10        | 0.965            | 71 ± 10          | 73 ± 10          | 0.977            |
| <b>Total Cholesterol (mmol/L)</b>      | 5.1 ± 1.0      | 5.1 ± 2.1      | 0.290            | 4.7 ± 0.8        | 5.1 ± 1.6        | 0.071            |
| <b>Triglyceride (mmol/L)</b>           | 0.8 (0.6-1.1)  | 1.0 (0.6-1.4)  | 0.348            | 0.9 (0.6-1.4)    | 1.3 (0.9-2.0)    | 0.494            |
| <b>HDL-C (mmol/L)</b>                  | 1.7 ± 0.5      | 1.4 ± 0.6      | 0.051            | 1.7 ± 0.6        | 1.4 ± 0.5        | 0.571            |
| <b>LDL-C (mmol/L)</b>                  | 2.9 ± 1.0      | 3.2 ± 1.4      | 0.790            | 2.5 ± 0.7        | 3.0 ± 1.3        | <b>0.013</b>     |
| <b>Glu-fast (mmol/L)</b>               | 4.8 ± 0.5      | 5.5 ± 0.6      | <b>&lt;0.001</b> | 4.8 ± 0.5        | 5.4 ± 0.5        | <b>&lt;0.001</b> |
| <b>Glu-2h (mmol/L)</b>                 | 6.2 ± 1.8      | 7.8 ± 1.8      | <b>0.006</b>     | 6.5 ± 1.6        | 7.7 ± 1.6        | <b>0.008</b>     |
| <b>Insulin (μU/ml)</b>                 | 7.4 (4.8-10.9) | 8.7 (7.9-13.0) | 0.051            | 8.3 (4.7-16.2)   | 24.2 (12.1-33.9) | <b>&lt;0.001</b> |
| <b>HOMA-IR</b>                         | 1.6 (1.0-2.4)  | 2.3 (2.0-3.6)  | <b>0.001</b>     | 1.8 (1.1-3.6)    | 5.5 (2.7-8.3)    | <b>&lt;0.001</b> |
| <b>HOMA-β</b>                          | 129 (79-204)   | 97 (76-173)    | 0.630            | 128 (81-235)     | 260 (175-329)    | <b>0.003</b>     |
| <b>eGFR (mL/min/1.73m<sup>2</sup>)</b> | 96.2 ± 17.0    | 87.0 ± 6.1     | 0.907            | 110.2 ± 12.1     | 115.5 ± 16.9     | 0.384            |
| <b>AMH (pmol/l)</b>                    | 1.9 (0.1-8.0)  | 0.5 (0.0-3.5)  | 0.382            | 30.0 (20.8-51.8) | 26.6 (14.8-39.8) | 0.215            |
| <b>LH (IU/L)</b>                       |                |                |                  | 9.0 ± 7.1        | 8.2 ± 4.8        | 0.844            |
| <b>FSH (IU/L)</b>                      |                |                |                  | 5.6 ± 2.2        | 5.6 ± 1.7        | 0.979            |
| <b>LH/FSH</b>                          |                |                |                  | 1.6 ± 1.2        | 1.5 ± 0.8        | 0.787            |
| <b>Testosterone (nmol/L)</b>           |                |                |                  | 1.6 (1.2-2.2)    | 1.8 (1.1-2.6)    | 0.417            |
| <b>Estrogen (pmol/L)</b>               |                |                |                  | 141 (113-237)    | 147 (127-186)    | 0.992            |
| <b>Use of metformin</b>                | 0/108          | 0/11           | N/A              | 7/95 (7.4% )     | 2/25 ( 8.0% )    | 0.586            |
| <b>Use of anti-hypertension drugs</b>  | 0/108          | 0/11           | N/A              | 3/95 (3.2%)      | 1/25 ( 4.0% )    | 0.835            |
| <b>Use of lipid-lowering drug</b>      | 0/108          | 0/11           | N/A              | 0/95             | 3/25(13.3%)      | N/A              |
| <b>IGR</b>                             | 13/108 (12.0%) | 5/11 (45.5%)   | <b>0.003</b>     | 18/95 (18.9%)    | 14/25 (56.0%)    | <b>&lt;0.001</b> |

|                            |                   |                   |                  |                  |                  |              |
|----------------------------|-------------------|-------------------|------------------|------------------|------------------|--------------|
| <b>HT</b>                  | 9/108 (8.3%)      | 1/11 ( 9.1% )     | 0.931            | 12/95 (12.6%)    | 7/25 ( 28.0% )   | 0.061        |
| <b>Dyslipidemia</b>        | 69/108 (63.9%)    | 9/11 ( 81.8% )    | 0.233            | 42/95 (44.2%)    | 15/24 ( 62.5% )  | 0.109        |
| <b>FGF-19 (pg/ml)</b>      | 122 (57-177)      | 189 (77-374)      | <b>0.007</b>     | 191 (108-335)    | 210 (132-274)    | 0.767        |
| <b>FGF-21 (pg/ml)</b>      | 79 (28-150)       | 232 (142-315)     | <b>&lt;0.001</b> | 139 (59-256)     | 155 (57-261)     | 0.928        |
| <b>Lipocalin-2 (ng/ml)</b> | 96.3 (62.9-166.8) | 78.9 (63.1-153.8) | 0.487            | 52.0 (33.4-65.9) | 70.6 (42.3-99.2) | <b>0.028</b> |

Data are expressed as mean  $\pm$  SD, median (Q1-Q3) or proportion in %; Ln transformation was used in triglyceride, insulin, HOMA-IR, HOMA- $\beta$ , AMH, FGF-19, FGF-21 and Lipocalin-2.

Abbreviation: BMI, body mass index; SBP, systolic blood pressure; DBP, diastolic blood pressure; HDL-C, high-density lipoprotein cholesterol; LDL-C, low-density lipoprotein cholesterol; Glu-fast, fasting glucose; Glu-2h, two-hour glucose; HOMA-IR, homeostasis model assessment of insulin resistance; HOMA- $\beta$ , homeostasis model assessment of beta cell function; eGFR, estimated glomerular filtration rate; AMH, anti-Mullerian hormone; LH, luteinizing hormone; FSH, follicle-stimulating hormone; IGR, impaired glucose regulation; HT, hypertension
