# Supplementary material for: Association between FGF19, FGF21 and lipocalin-2, and diabetes progression in PCOS
Source: PubMed Central journal article supplement — Endocr Connect. 2021 Sep 2;10(10):1243–52. doi: 10.1530/EC-21-0082 (PMC8494400; doi:10.1530/ec-21-0082), 2021-09-02
Supplement: supplementary_table_6.pdf [file supplementary_table_6.pdf]

Table S6 The relationship between 3 biomarkers and clinical variables at baseline and follow-up

| Variables                         | Ln (FGF19)    |                  | Ln (FGF21)    |              | Ln (lipocalin2) |                  |
|-----------------------------------|---------------|------------------|---------------|--------------|-----------------|------------------|
|                                   | r             | P value          | r             | P value      | r               | P value          |
| Baseline                          |               |                  |               |              |                 |                  |
| Age (years)                       | <b>-0.174</b> | <b>0.006</b>     | -0.091        | 0.163        | <b>0.307</b>    | <b>0.000</b>     |
| BMI (kg/m <sup>2</sup> )          | -0.005        | 0.937            | -0.044        | 0.503        | 0.010           | 0.869            |
| waist (cm)                        | 0.073         | 0.249            | 0.013         | 0.846        | -0.032          | 0.614            |
| Waist-to-hip ratio                | 0.055         | 0.384            | 0.065         | 0.320        | -0.027          | 0.668            |
| SBP (mmHg)                        | 0.002         | 0.971            | 0.044         | 0.498        | -0.014          | 0.827            |
| DBP (mmHg)                        | -0.020        | 0.748            | 0.028         | 0.672        | 0.006           | 0.922            |
| Glu-fast (mmol/L)                 | -0.048        | 0.452            | 0.047         | 0.478        | -0.007          | 0.913            |
| Glu-2h (mmol/L)                   | -0.021        | 0.756            | 0.030         | 0.679        | 0.016           | 0.811            |
| Ln (Insulin)                      | -0.050        | 0.428            | 0.069         | 0.296        | -0.026          | 0.678            |
| Ln (HOMA-IR)                      | 0.016         | 0.821            | 0.122         | 0.094        | -0.052          | 0.458            |
| Total Cholesterol (mmol/L)        | <b>-0.124</b> | <b>0.049</b>     | -0.078        | 0.235        | 0.112           | 0.073            |
| ln (Triglyceride)                 | -0.003        | 0.964            | 0.086         | 0.188        | 0.023           | 0.720            |
| HDL-C (mmol/L)                    | -0.019        | 0.764            | -0.050        | 0.443        | 0.069           | 0.275            |
| LDL-C (mmol/L)                    | -0.117        | 0.064            | -0.029        | 0.659        | 0.105           | 0.094            |
| eGFR (mL/min/1.73m <sup>2</sup> ) | 0.118         | 0.263            | -0.003        | 0.981        | <b>-0.233</b>   | <b>0.024</b>     |
| Ln (AMH)                          | <b>0.282</b>  | <b>&lt;0.001</b> | <b>0.185</b>  | <b>0.007</b> | <b>-0.361</b>   | <b>&lt;0.001</b> |
| Follow-up                         |               |                  |               |              |                 |                  |
| Age (years)                       | <b>-0.202</b> | <b>0.002</b>     | <b>-0.158</b> | <b>0.021</b> | <b>0.303</b>    | <b>&lt;0.001</b> |
| BMI (kg/m <sup>2</sup> )          | 0.018         | 0.789            | 0.049         | 0.480        | 0.054           | 0.418            |
| waist (cm)                        | -0.023        | 0.726            | 0.028         | 0.689        | 0.123           | 0.063            |
| Waist-to-hip ratio                | -0.073        | 0.274            | 0.030         | 0.666        | <b>0.166</b>    | <b>0.012</b>     |
| SBP (mmHg)                        | -0.017        | 0.796            | 0.131         | 0.055        | 0.014           | 0.829            |
| DBP (mmHg)                        | 0.050         | 0.454            | 0.132         | 0.054        | <b>-0.137</b>   | <b>0.039</b>     |
| Glu-fast (mmol/L)                 | -0.066        | 0.314            | 0.098         | 0.147        | 0.011           | 0.867            |
| Glu-2h (mmol/L)                   | 0.079         | 0.255            | 0.063         | 0.384        | -0.013          | 0.847            |
| ln (Insulin)                      | 0.067         | 0.311            | 0.091         | 0.185        | 0.016           | 0.813            |
| Ln (HOMA-IR)                      | -0.005        | 0.947            | 0.093         | 0.187        | 0.040           | 0.561            |
| Total Cholesterol (mmol/L)        | <b>-0.163</b> | <b>0.014</b>     | -0.131        | 0.057        | 0.080           | 0.226            |
| ln (Triglyceride)                 | -0.085        | 0.218            | 0.088         | 0.212        | 0.029           | 0.670            |
| HDL-C (mmol/L)                    | 0.009         | 0.897            | <b>-0.234</b> | <b>0.001</b> | 0.025           | 0.704            |
| LDL-C (mmol/L)                    | <b>-0.150</b> | <b>0.023</b>     | -0.032        | 0.642        | 0.081           | 0.220            |
| eGFR (mL/min/1.73m <sup>2</sup> ) | 0.097         | 0.147            | <b>0.184</b>  | <b>0.007</b> | <b>-0.153</b>   | <b>0.021</b>     |
| HbA <sub>1C</sub> (%)             | -0.087        | 0.342            | <b>0.226</b>  | <b>0.019</b> | <b>-0.278</b>   | <b>0.002</b>     |

Ln transformation was used in triglyceride, insulin, HOMA-IR, AMH, FGF-19, FGF-21 and Lipocalin-2.

Abbreviation: BMI, body mass index; SBP, systolic blood pressure; DBP, diastolic blood pressure; HDL-C, high-density lipoprotein cholesterol; LDL-C, low-density lipoprotein

cholesterol; Glu-fast, fasting glucose; Glu-2h, two-hour glucose; HOMA-IR, homeostasis model assessment of insulin resistance; eGFR, estimated glomerular filtration rate; AMH, anti-Mullerian hormone.
